# Supplementary material for: Self-assembled di- and tripeptide gels for the passive entrapment and pH-responsive, sustained release of an antidiabetic drug, glimepiride
Source: Royal Society of Chemistry journal article supplement (doi:10.1039/d2bm00344a), 2022-01-01
Supplement: d2bm00344a1.pdf [file d2bm00344a1.pdf]

## Supplementary Figures and Data

# Self-Assembled Di- and Tripeptide Gels for the Passive Entrapment and pH-Responsive, Sustained Release of an Antidiabetic Drug, Glimepiride

*Moumita Halder, Yatin Bhatia, and Yashveer Singh\**

Department of Chemistry, Indian Institute of Technology Ropar, Rupnagar - 140 001, Punjab,  
India

\*Corresponding author. Email: [yash@iitrpr.ac.in](mailto:yash@iitrpr.ac.in)

### Index

| Contents                                                                        | Page # |
|---------------------------------------------------------------------------------|--------|
| <b>Fig. S1</b> RP-HPLC of peptides.                                             | S3     |
| <b>Fig. S2</b> Mass spectrum of Fmoc-YY-NH <sub>2</sub> peptide.                | S4     |
| <b>Fig. S3</b> Mass spectrum of Fmoc-WW-NH <sub>2</sub> peptide.                | S5     |
| <b>Fig. S4</b> Mass spectrum of Fmoc-WWH-NH <sub>2</sub> peptide.               | S6     |
| <b>Fig. S5</b> <sup>1</sup> H NMR spectrum of Fmoc-YY-NH <sub>2</sub> peptide.  | S7     |
| <b>Fig. S6</b> <sup>1</sup> H NMR spectrum of Fmoc-WW-NH <sub>2</sub> peptide.  | S8     |
| <b>Fig. S7</b> <sup>1</sup> H NMR spectrum of Fmoc-WWH-NH <sub>2</sub> peptide. | S9     |
| <b>Fig. S8</b> FTIR spectra of peptides.                                        | S10    |
| <b>Fig. S9</b> Images of peptide gels.                                          | S11    |

|                                                                                   |     |
|-----------------------------------------------------------------------------------|-----|
| <b>Fig. S10</b> SEM images of glimepiride-loaded peptide gels.                    | S12 |
| <b>Fig. S11</b> Injectability of WWH gels.                                        | S12 |
| <b>Fig. S12</b> Swelling and degradation of peptide gels.                         | S13 |
| <b>Fig. S13</b> Images of peptide gels after swelling and degradation studies.    | S14 |
| <b>Fig. S14</b> Standard curve of glimepiride.                                    | S15 |
| <b>Fig. S15</b> Morphology of cells after treatment with peptides and gels.       | S16 |
| <b>Fig. S16</b> Live/dead assay of cells after incubation with peptides and gels. | S17 |
| <b>Fig. S17</b> Cell viability after H <sub>2</sub> O <sub>2</sub> treatment.     | S18 |
| <b>Fig. S18</b> Fluorescence image of glucose uptake.                             | S18 |

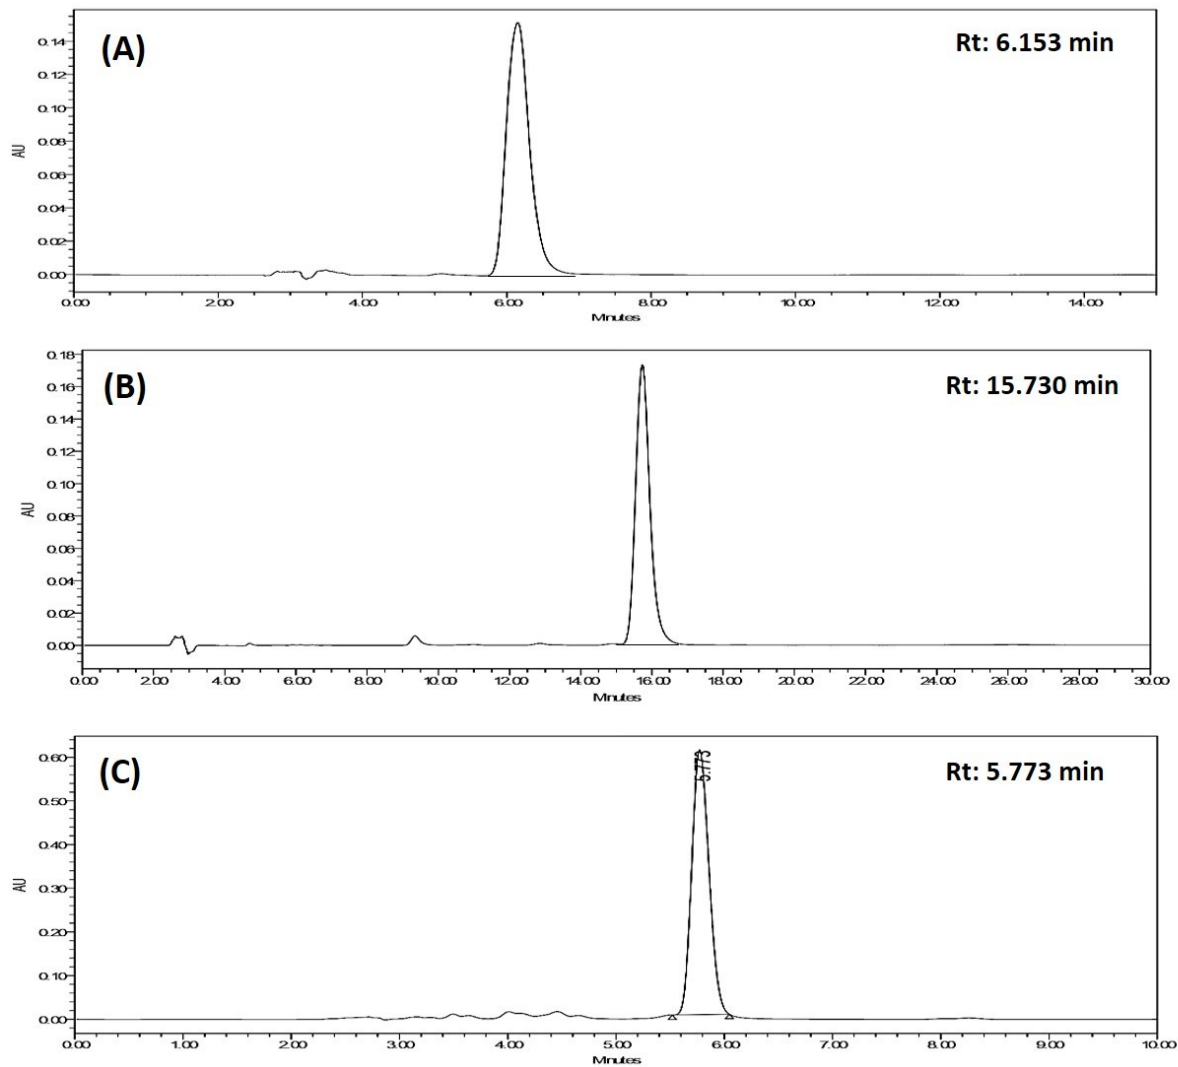

**Fig. S1** RP-HPLC of peptides. (A) Fmoc-YY-NH<sub>2</sub>. (B) Fmoc-WW-NH<sub>2</sub>. (C) Fmoc-WWH-NH<sub>2</sub>.

Sample Name : YS-YB-YY-03  
Test Name : D MASS-1  
211119-YS-YB-YY-03 12 (0.214) Cm (12:13-(17:39+3))

IITRPR

XEVO G2-XS QTOF

1: TOF MS ES+  
4.38e6

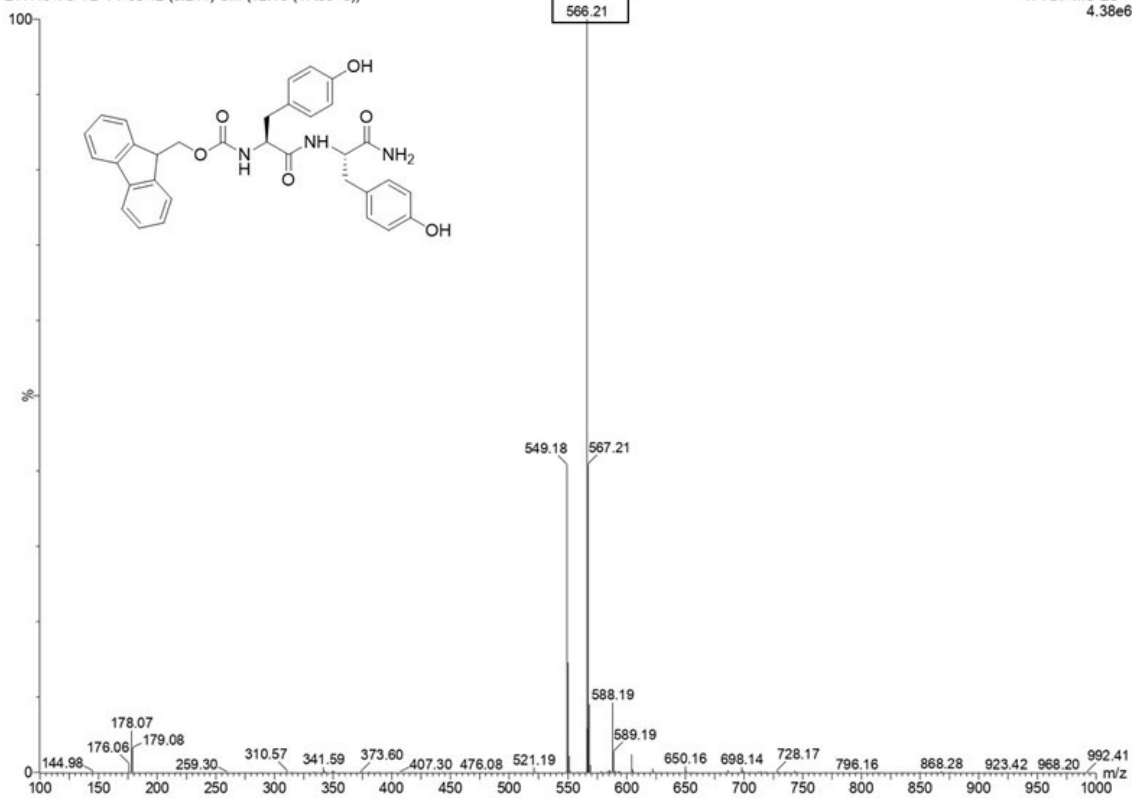

Fig. S2 Mass spectrum of Fmoc-YY-NH<sub>2</sub> peptide.

Sample Name : YS-YB-WW-11  
Test Name : D MASS-1  
250220-YS-YB-WW-11 9 (0.163)

IITRPR

XEVO G2-XS QTOF

1: TOF MS ES+  
1.96e7

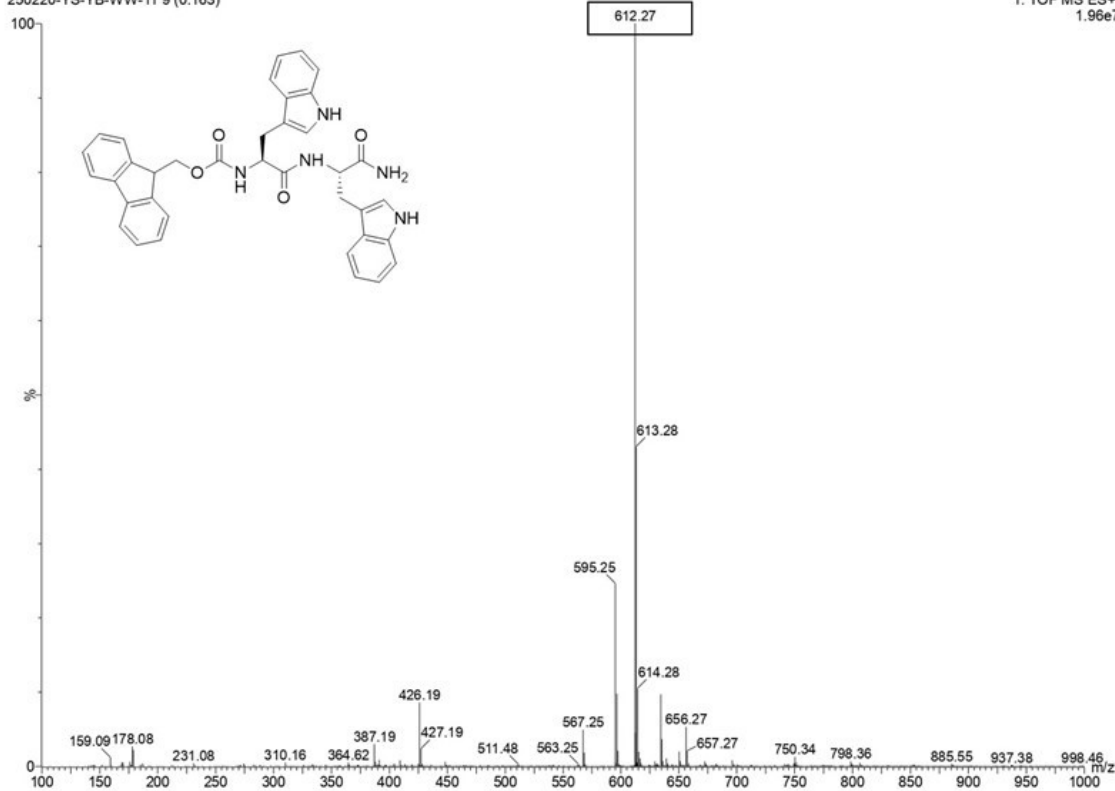

Fig. S3 Mass spectrum of Fmoc-WW-NH<sub>2</sub> peptide.

Sample Name : YS-MH-WWLH3  
Test Name : D MASS-1  
261020-YS-MH-WWLH3 11 (0.197)

IITRPR

UPLC-XEVOG2XSQTOF

1: TOF MS ES+  
1.26e7

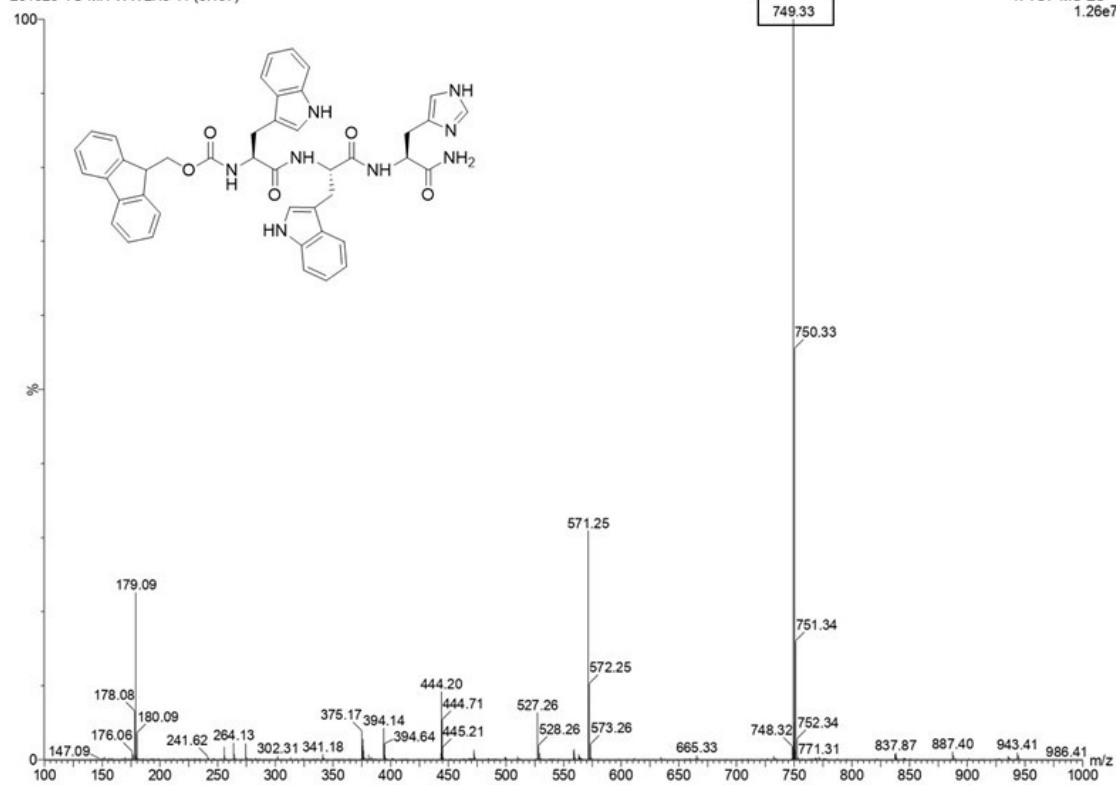

Fig. S4 Mass spectrum of Fmoc-WWH-NH<sub>2</sub> peptide.

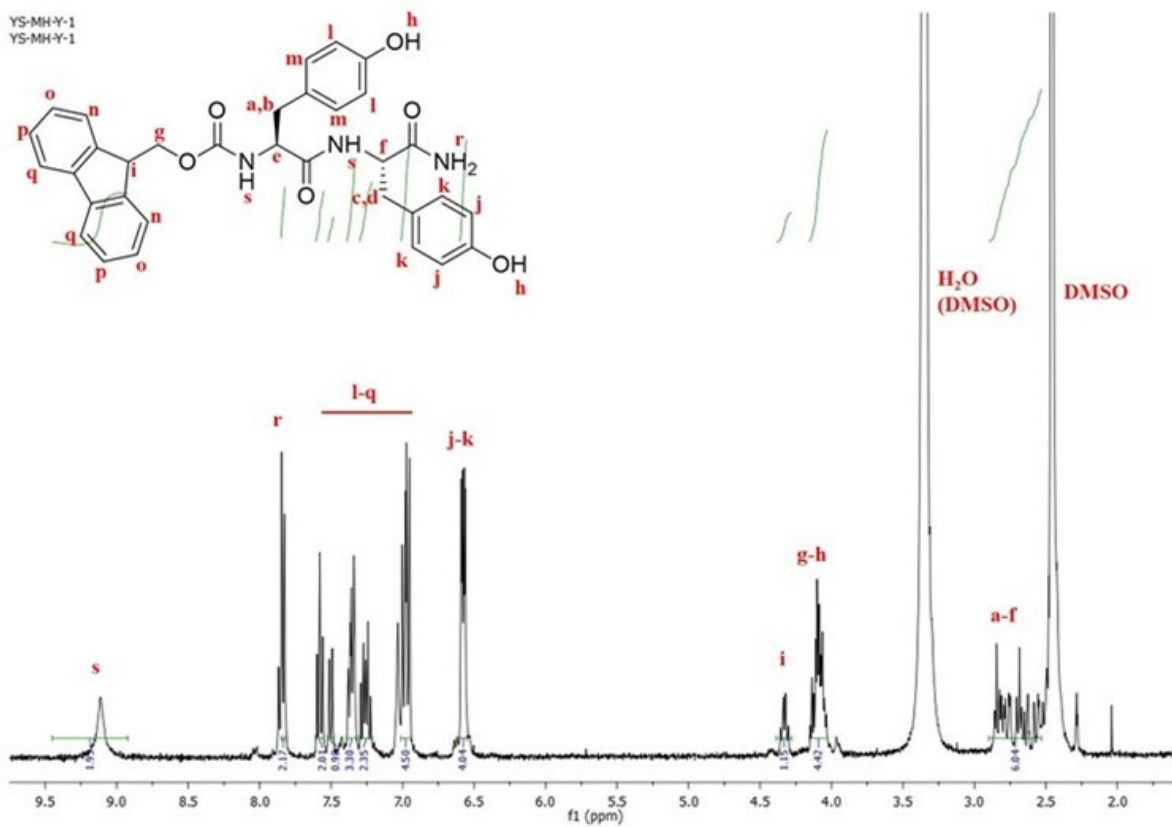

Fig. S5  $^1\text{H}$  NMR spectrum of Fmoc-YY-NH<sub>2</sub> peptide.

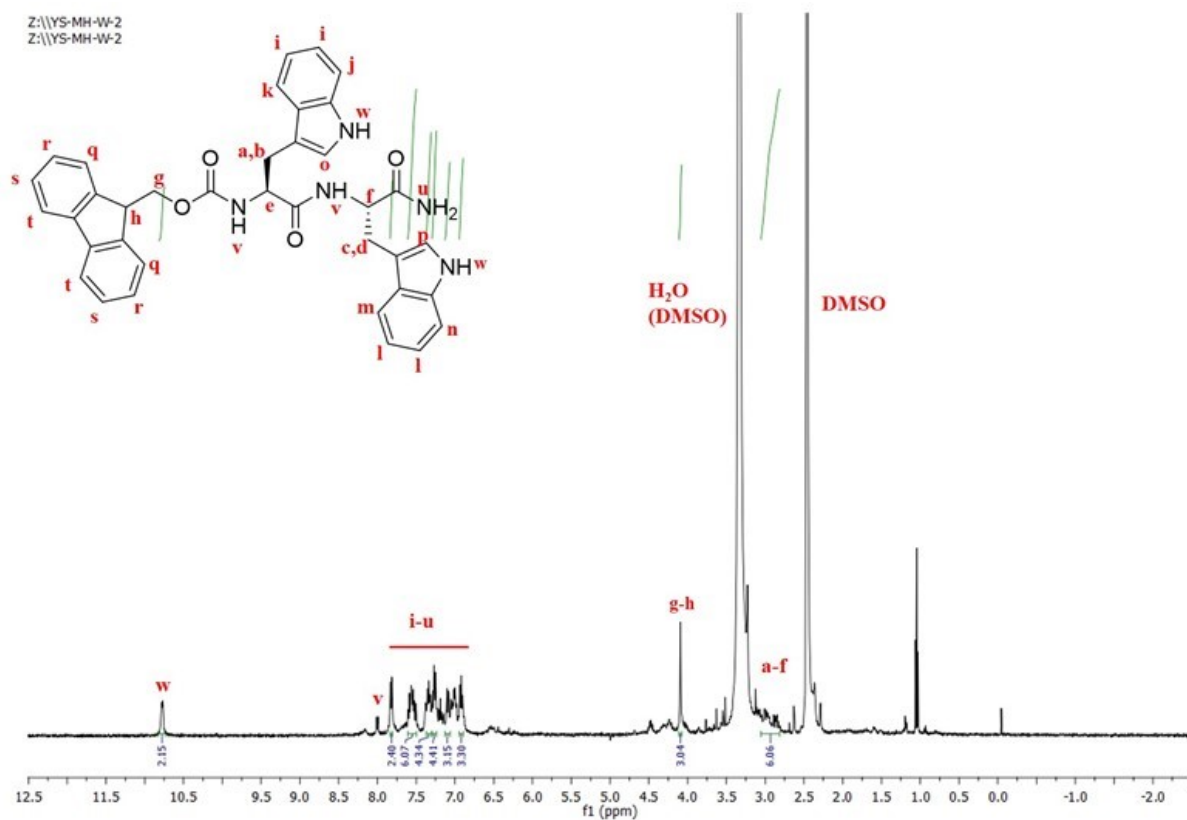

**Fig. S6** <sup>1</sup>H NMR spectrum of Fmoc-WW-NH<sub>2</sub> peptide.





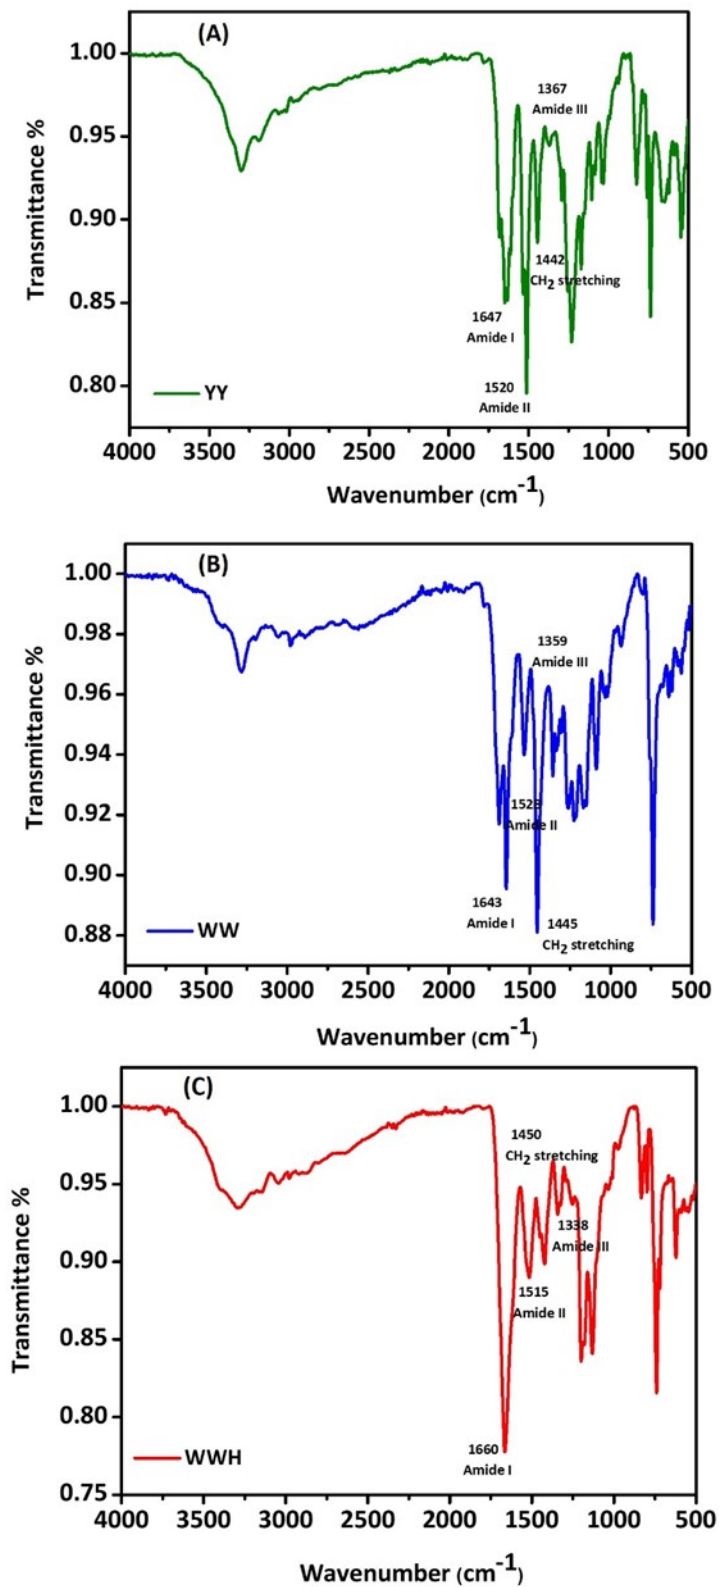

**Fig. S8** FTIR spectra of peptides. (A) YY. (B) WW. (C) WWH.

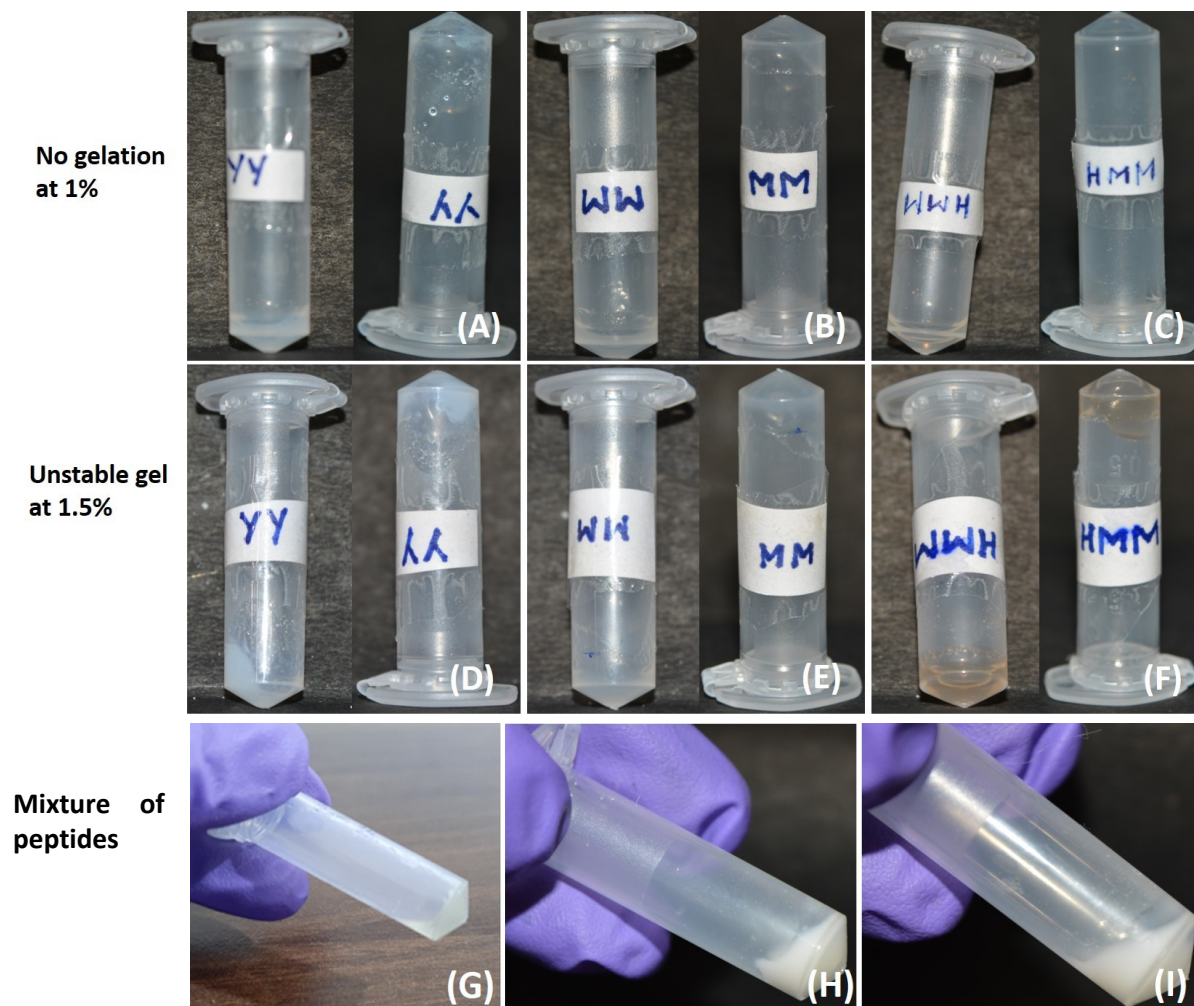

**Fig. S9** Images of peptide gels at different concentrations. (A, D) YY. (B, E) WW. (C, F) WWH. Combination of YY, WW, and WWH for gelation at different concentrations. (G) 1%. (H) 1.5%. (I) 2%.

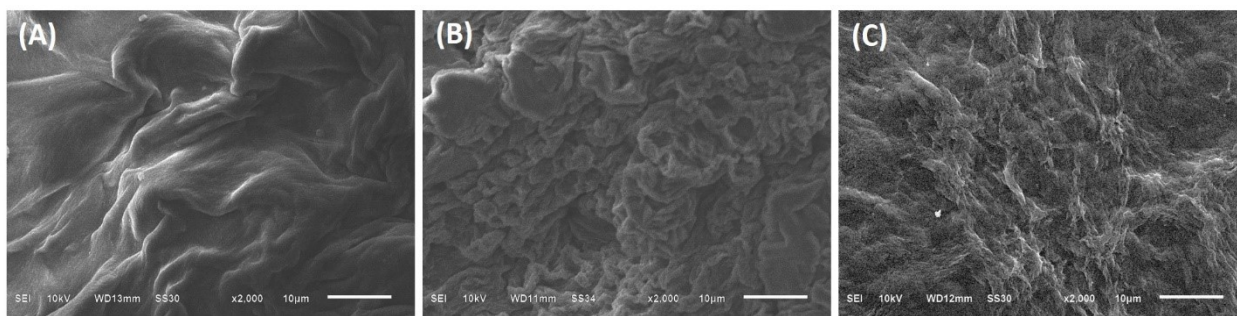

**Fig. S10** Scanning electron microscopy (SEM) images of dried glimepiride-loaded peptide gels (2% w/v). (A) YY. (B) WW. (C) WWH. Scale bar 10 µm.

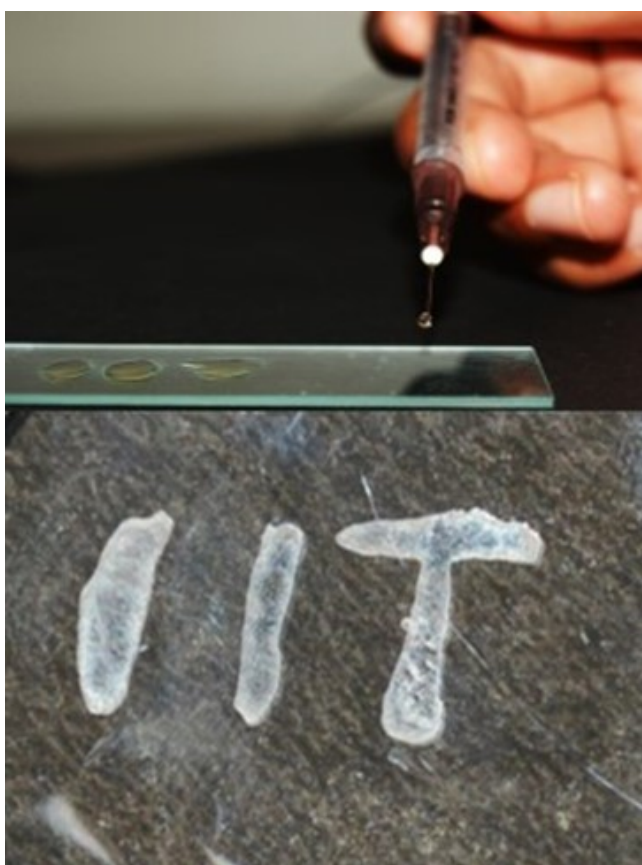

**Fig. S11** Injectability of WWH gel.

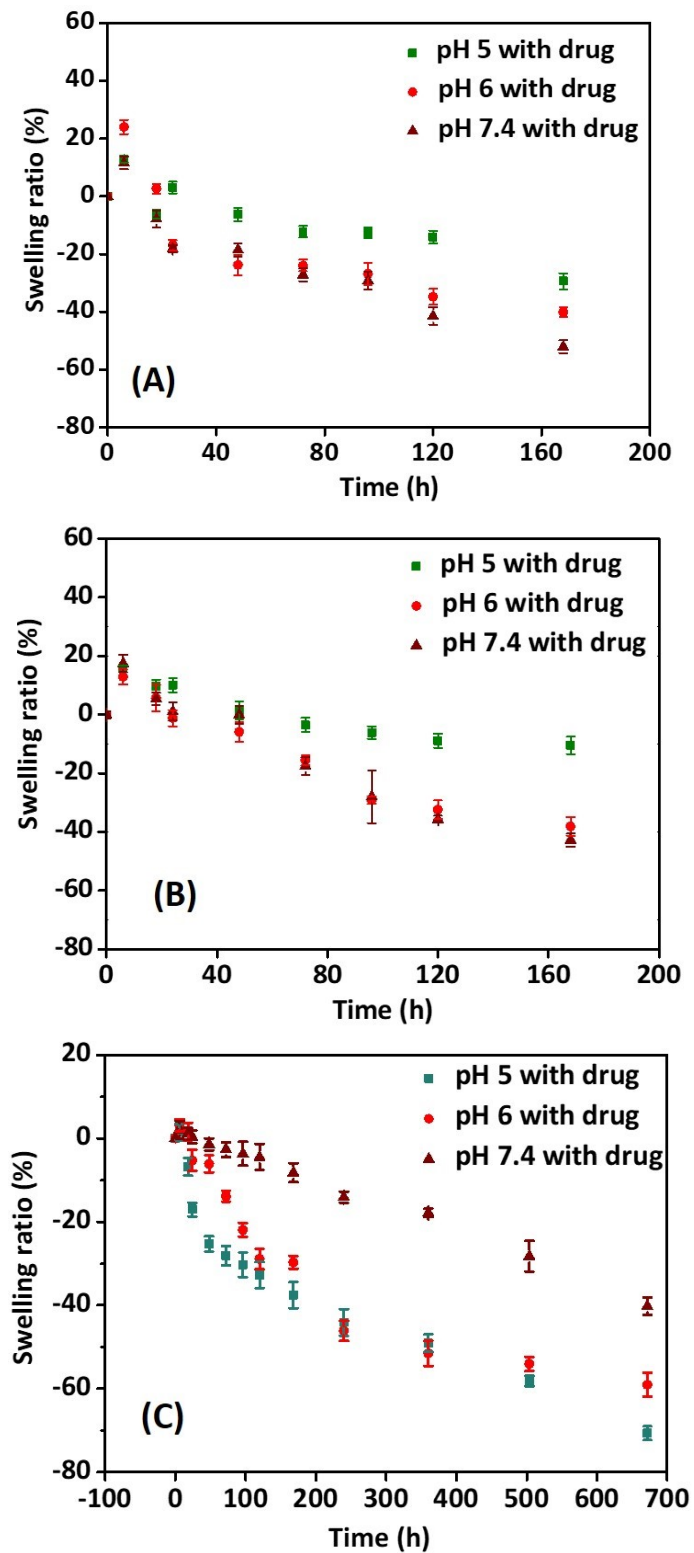

**Fig. S12** Swelling and degradation of glimepiride-loaded peptide gels at pH 5, 6, and 7.4. (A) YY. (B) WW. (C) WWH. Values above 0% indicate gravimetric water uptake, whereas negative values suggest degradation. Data reported are mean  $\pm$  SE (n = 3).



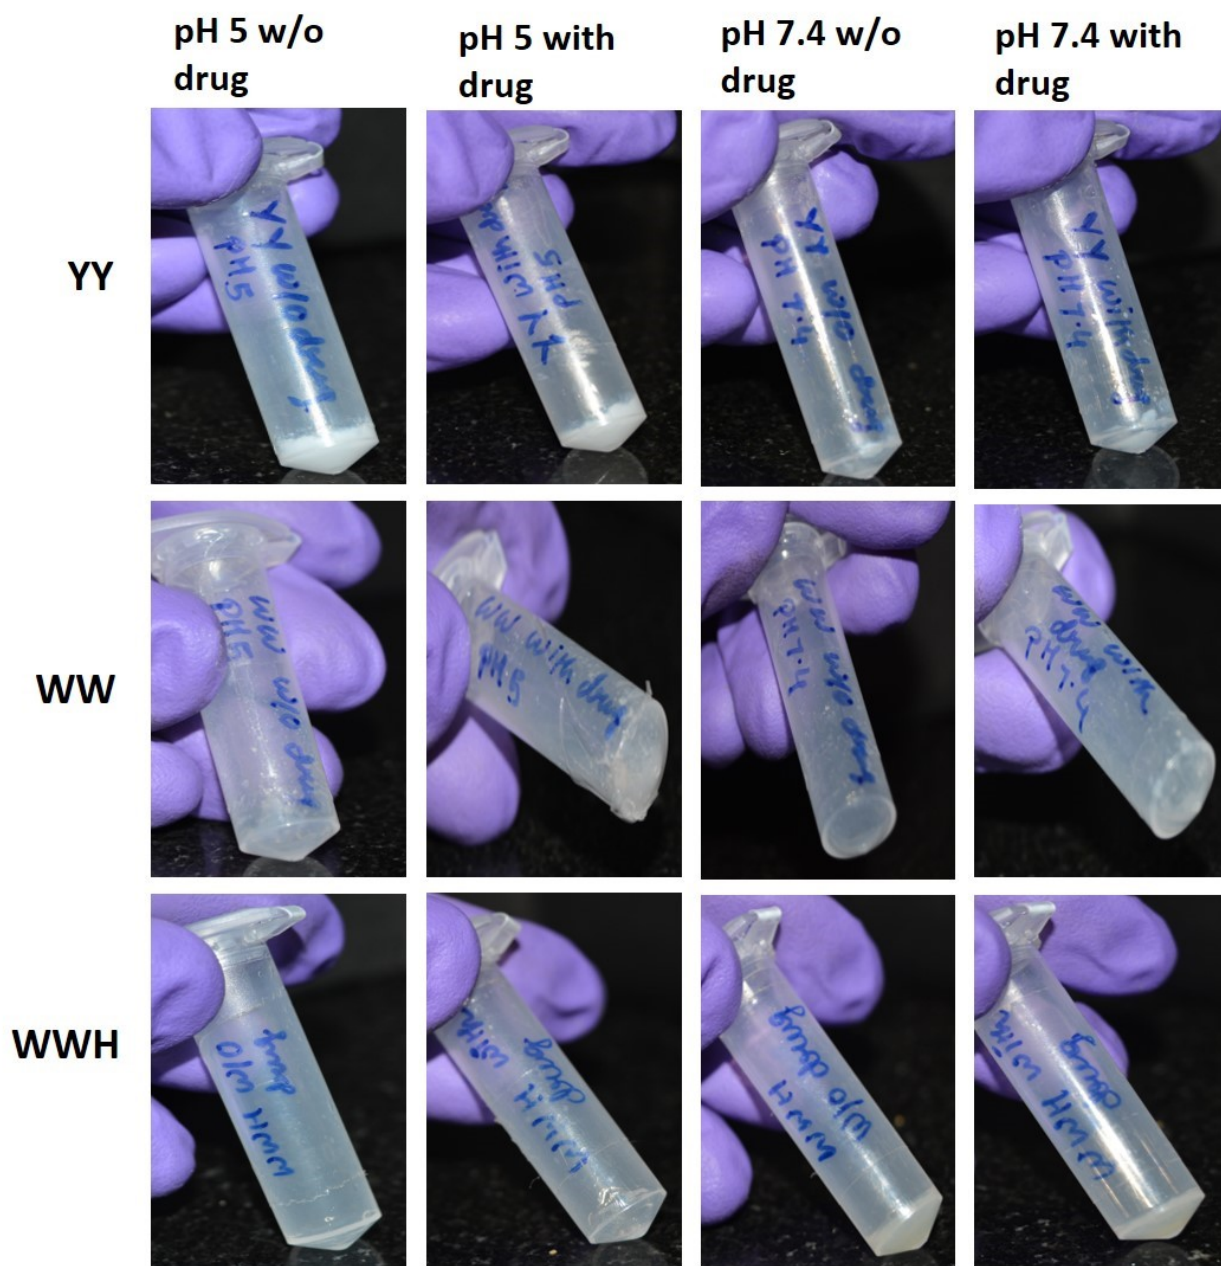

Fig. S13 Images of peptide gels after swelling and degradation studies.

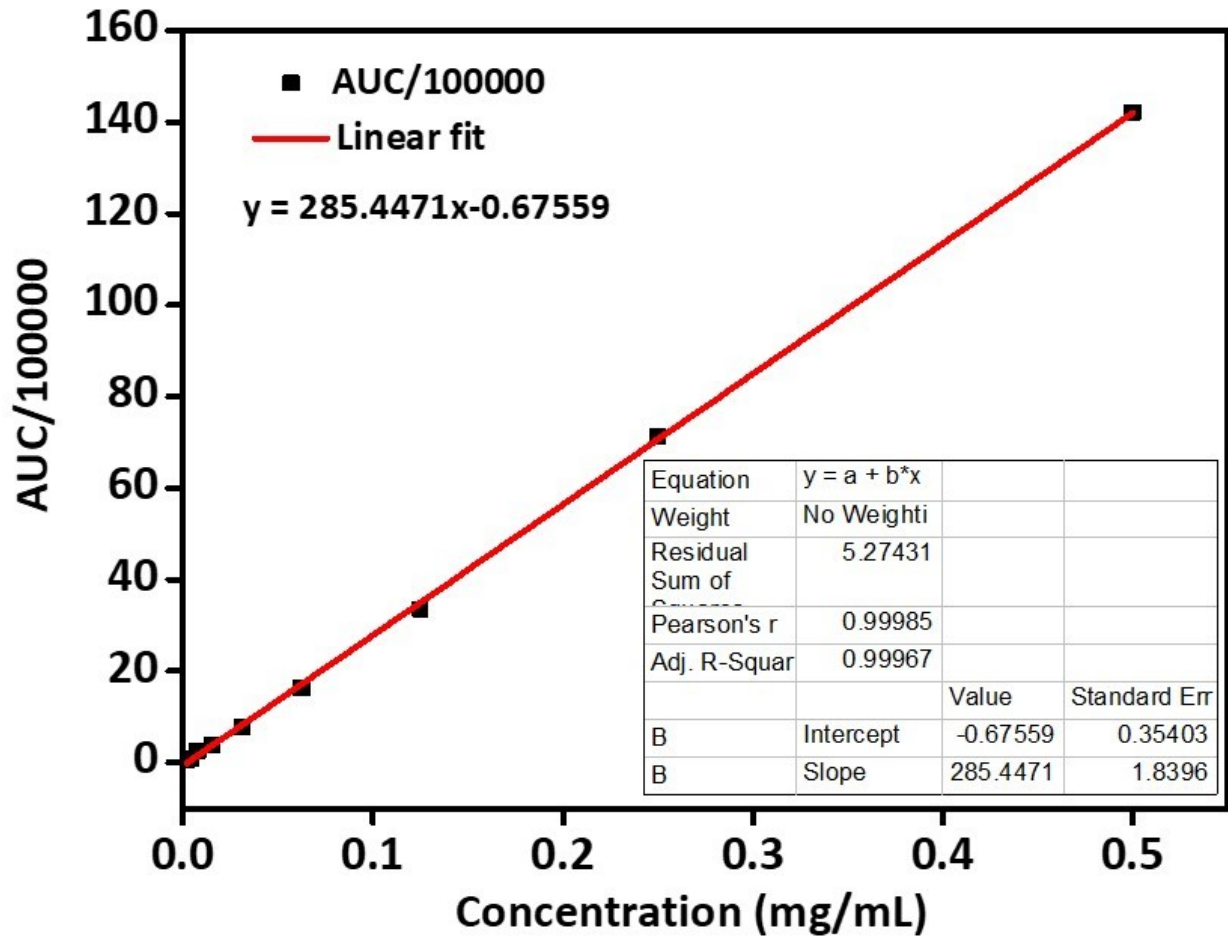

Fig. S14 Standard curve of glimepiride.

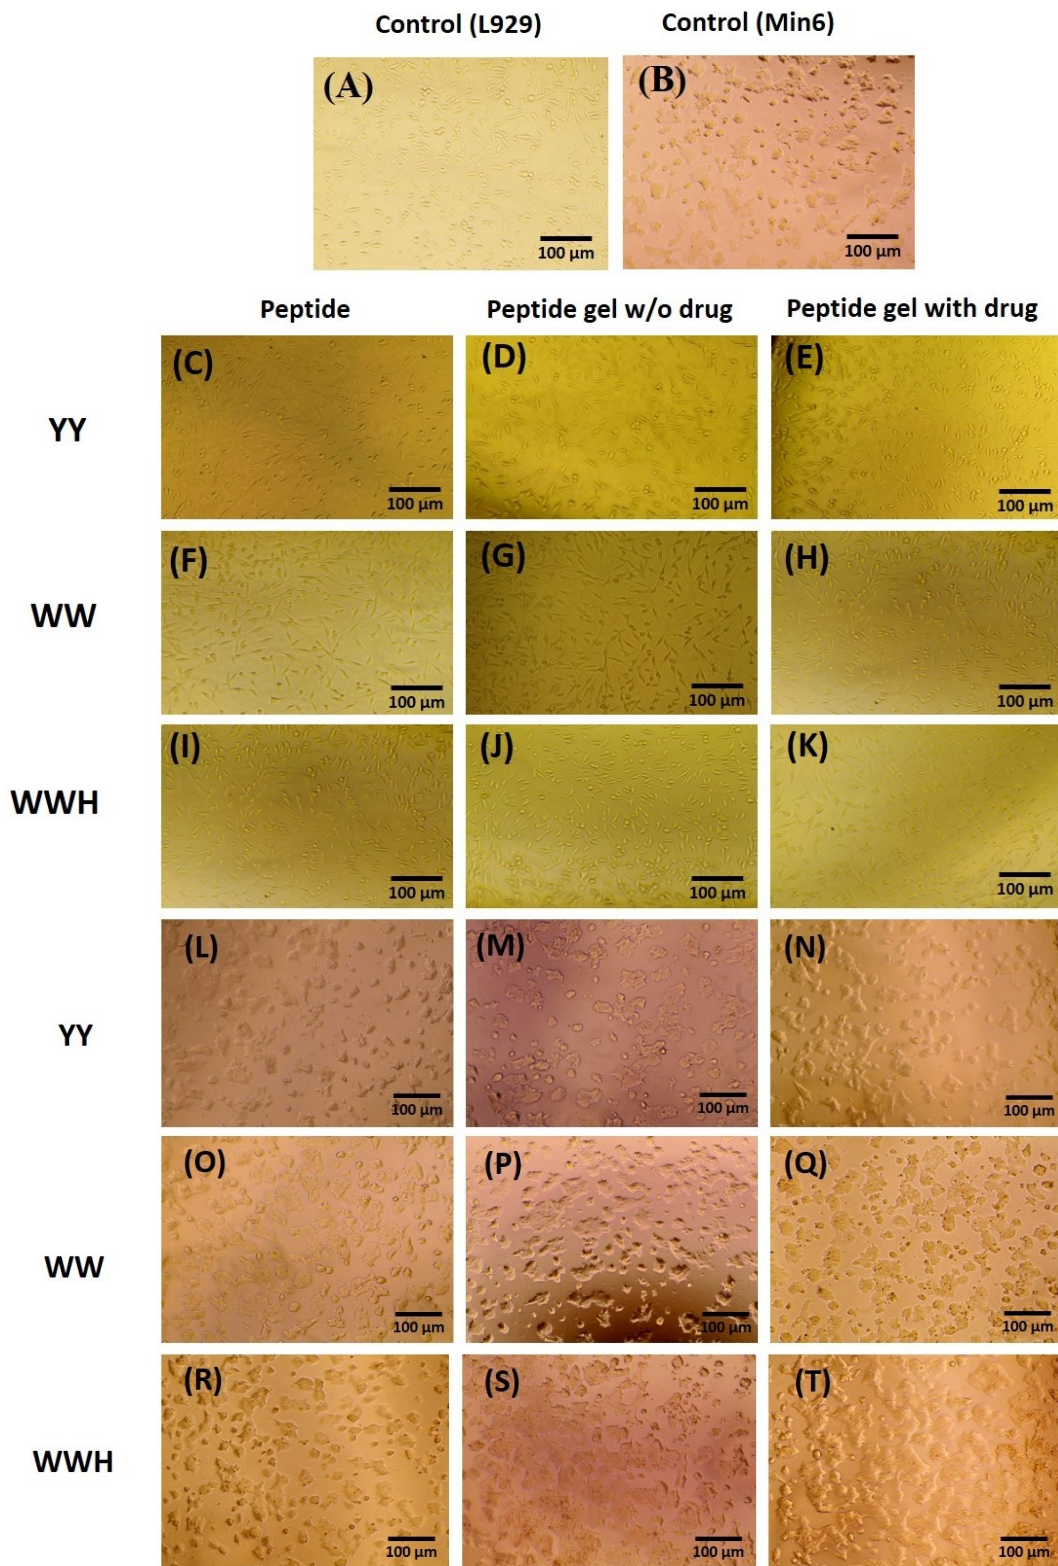

**Fig. S15** Images of cells after treatment with peptides, peptide gels, and glimepiride-loaded peptide gels for 24 h. (A, B) Control of L929 and Min6 cells. (C-K) L929 cells. (L-T) Min6 cells. Cells without peptides/gels were taken as a control.



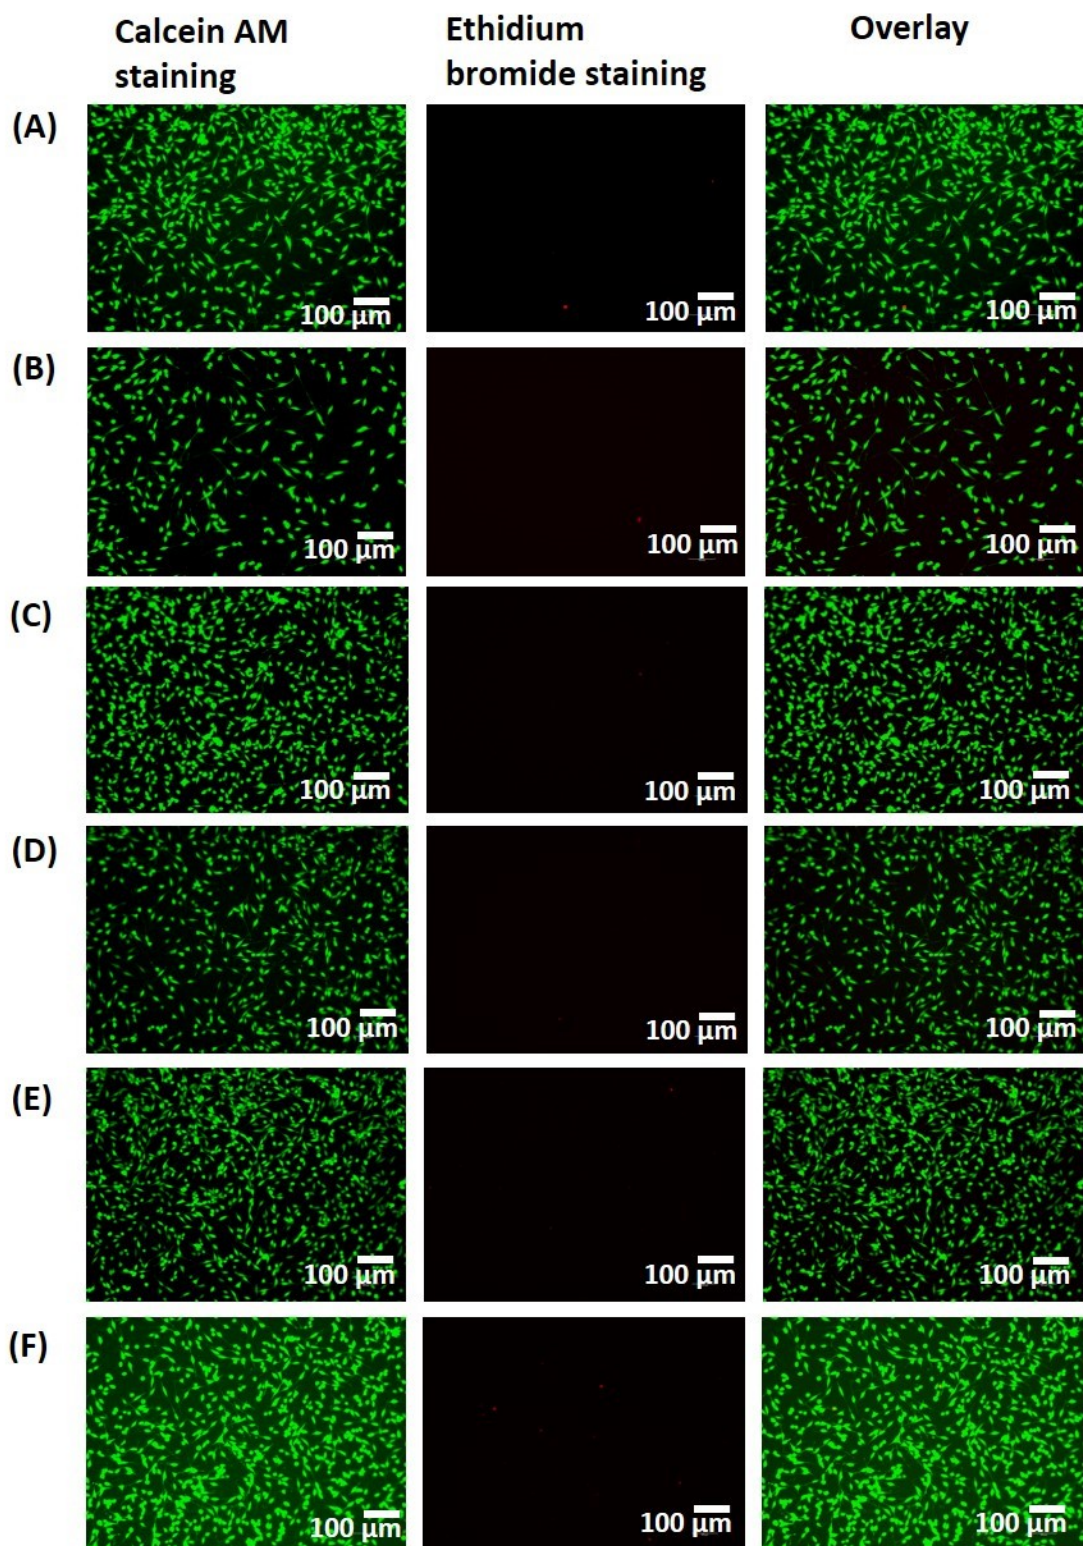

**Fig. S16** Fluorescence images of L929 cells stained with live and dead cell staining dyes, calcein AM and ethidium bromide, and acquired after 24 h of treatment with the releasate of peptides/gels. (A) YY peptide. (B) YY peptide gel. (C) WW peptide. (D) WW peptide gel. (E) WWH peptide. (F) WWH peptide gel. Scale bar: 100  $\mu\text{m}$ .

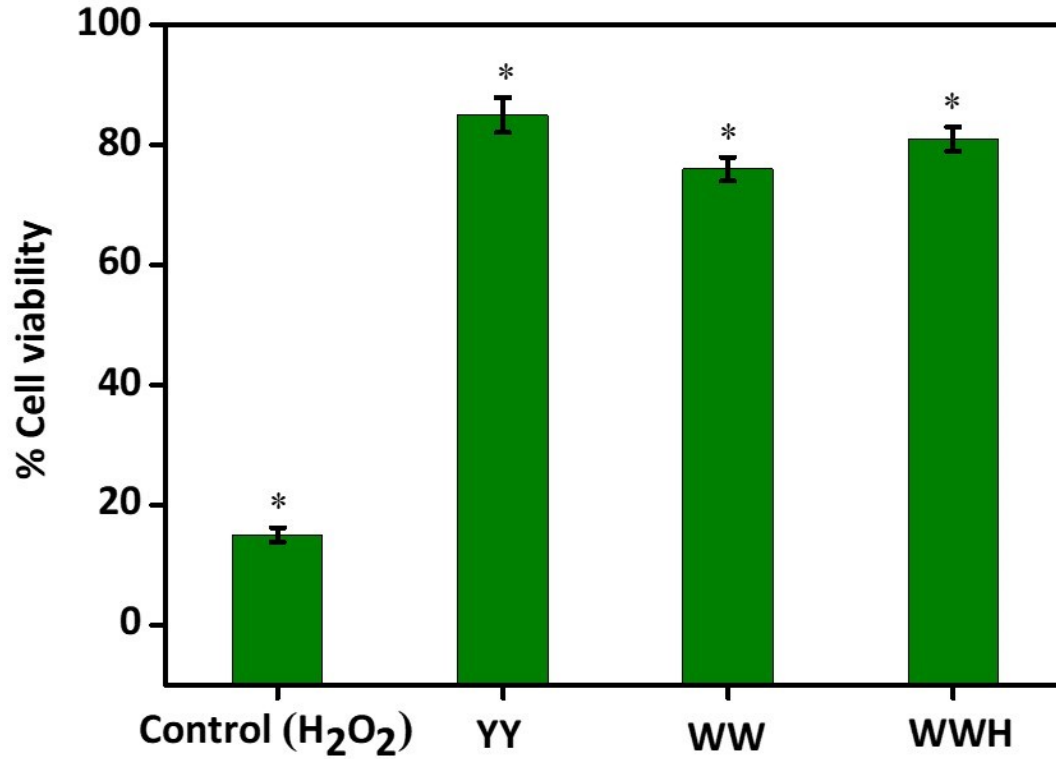

**Fig. S17** Effect of glimepiride-loaded peptide gels on the viability of H<sub>2</sub>O<sub>2</sub>-treated HepG2 cells. Data reported are mean ± SE (n = 3). Comparisons between two groups (samples to control) were carried out using Student's t-test. \*p < 0.05 indicates statistically significant data.

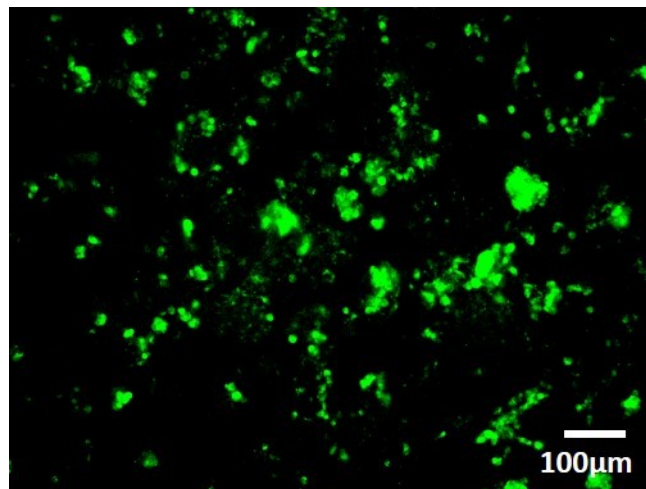

**Fig. S18** Fluorescence microscopy image of HepG2 cells incubated with 2-NBDG for 5 days in the presence of glimepiride solution (0.1 mg/mL).
